# Supplementary material for: β-Arrestin-1 is required for adaptive β-cell mass expansion during obesity
Source: Nat Commun. 2021 Jun 7;12:3385. doi: 10.1038/s41467-021-23656-1 (PMC8184739; doi:10.1038/s41467-021-23656-1)
Supplement: Supplementary file 1 — Supplementary Information [file 41467_2021_23656_MOESM1_ESM.pdf]

## Supplemental Information

### **$\beta$ -Arrestin-1 is Required for Adaptive $\beta$ -Cell Mass Expansion During Obesity**

Luiz F. Barella<sup>1</sup>, Mario Rossi<sup>1</sup>, Sai P. Pydi<sup>1</sup>, Jaroslawna Meister<sup>1</sup>, Shanu Jain<sup>2</sup>, Yinghong Cui<sup>1</sup>, Oksana Gavrilova<sup>3</sup>, Gianluca Fulgenzi<sup>4</sup>, Lino Tessarollo<sup>4</sup>, and Jürgen Wess<sup>1</sup>

<sup>1</sup>Molecular Signaling Section, Laboratory of Bioorganic Chemistry, National Institute of Diabetes and Digestive and Kidney Diseases, Bethesda, MD 20892, USA

<sup>2</sup>Molecular Recognition Section, Laboratory of Bioorganic Chemistry, National Institute of Diabetes and Digestive and Kidney Diseases, Bethesda, MD 20892, USA

<sup>3</sup>Mouse Metabolism Core, National Institute of Diabetes and Digestive and Kidney Diseases, Bethesda, Bethesda, MD 20892, USA

<sup>4</sup>Mouse Cancer Genetics Program, National Cancer Institute, Frederick 21702, MD, USA

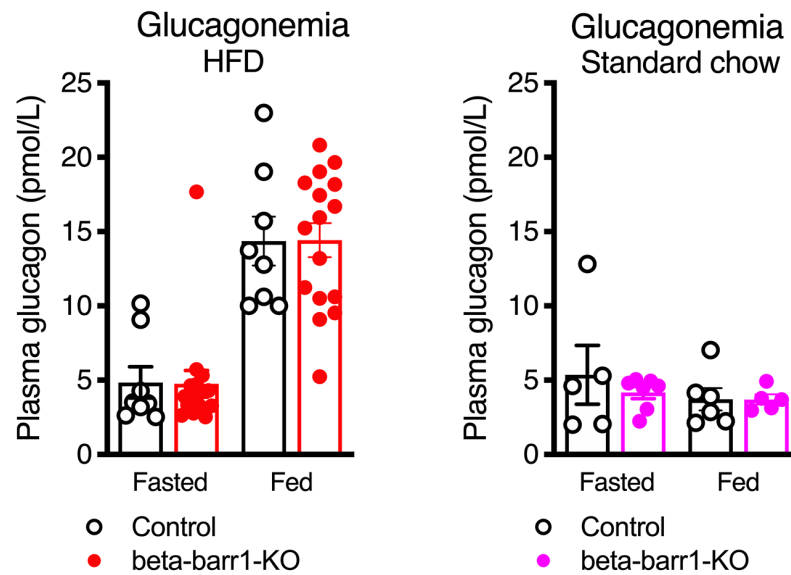

**Supplementary Fig. 1. Plasma glucagon levels are similar in HFD beta-barr1-KO mice and control littermates.** Plasma glucagon levels were determined in fasted (14-16 hr overnight) or freely fed mice. Mice were maintained either on a HFD or standard chow. Data are given as means  $\pm$  s.e.m. (left panel: 8 control and 16 KO mice under both fasting and fed conditions; right panel: 5 control and 7 KO mice under fasting conditions; 6 control and 5 KO mice under fed conditions). Mouse age: 19-20 weeks (left panel) and 11-12 weeks (right panel) respectively. Source data are provided as a Source data file.

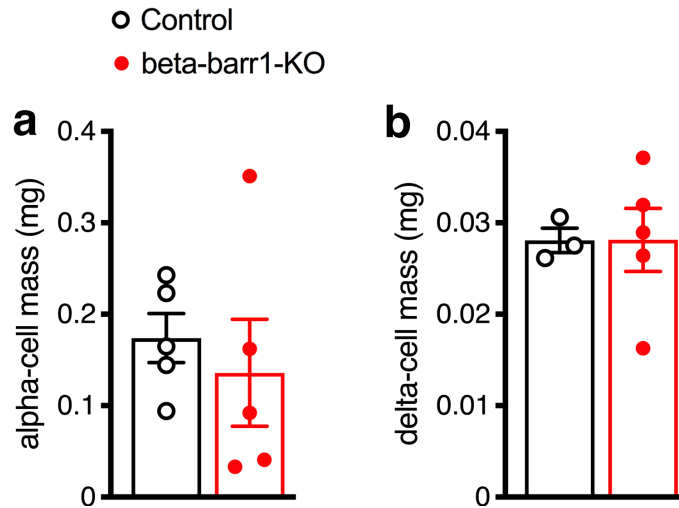

**Supplementary Fig. 2** Alpha-cell and delta-cell mass remained unchanged by beta-cell barr1 deficiency. **a, b** Alpha-cell mass and (a) and delta-cell mass (b) are similar in HFD beta-barr1-KO and HFD control mice. Data are given as means  $\pm$  s.e.m. (a, 5 control and 5 KO pancreatic sections were examined from 3 mice per genotype; b, 3 control and 5 KO pancreatic sections were examined from 3 mice per genotype; mouse age: 18 weeks). Source data are provided as a Source data file.

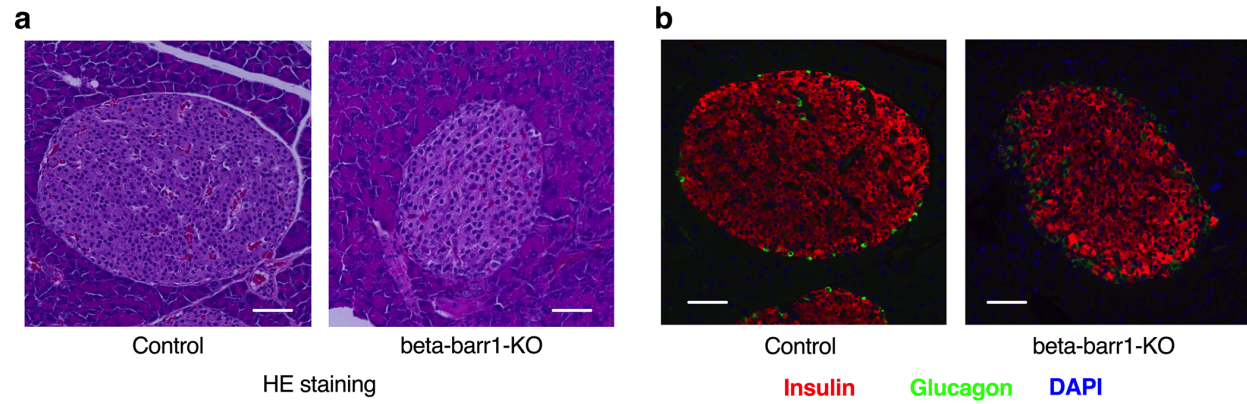

**Supplementary Fig. 3. Overall islet architecture is similar in HFD beta-barr1-KO mice and control littermates. a, b** Representative images of islets from HFD beta-barr1-KO mice and HFD control littermates stained with H&E (**a**) or with anti-insulin and anti-glucagon antibodies (**b**). Pancreatic sections were analyzed from 5 mice per group. Scale bar, 100  $\mu$ m.

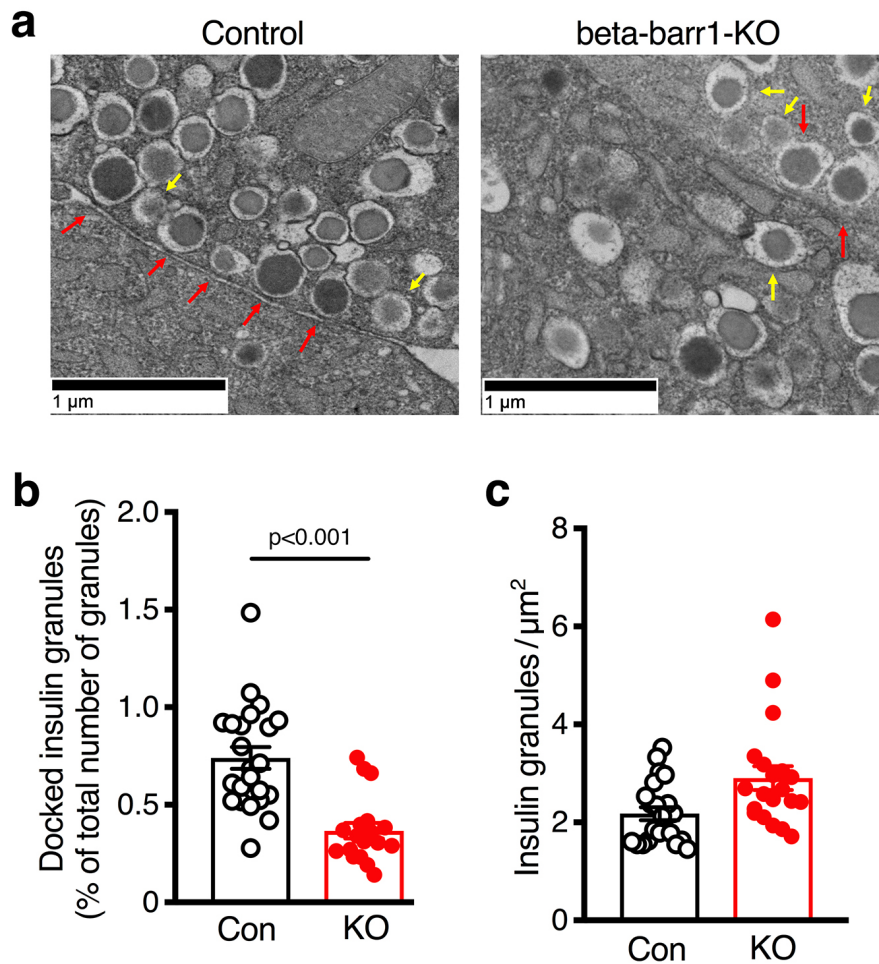

**Supplementary Fig. 4. The number of pre-docked insulin granules is reduced in beta-cells lacking barr1.** **a** Representative transmission electron microscope images of beta-cells from control (Con) and beta-barr1-KO (KO) mice (4800x magnification). Insulin vesicles pre-docked to the plasma membrane are indicated by red arrows, while not-docked vesicles are indicated by yellow arrows. Note that the docked vesicles frequently show an increase in electron dense material between the plasma and the vesicle membrane. Scale bar, 1  $\mu\text{m}$ . **b** Quantification of pre-docked insulin granules as percentage of total number of granules, normalized by  $\mu\text{m}$  of membrane. **c** Quantification of the total number of insulin granules per  $\mu\text{m}^2$ . Data are given as means  $\pm$  s.e.m. (n=20-24 beta-cells from 3 mice per group). *P* value is indicated in panel **b** (unpaired two-tailed t-test). Source data are provided as a Source data file.



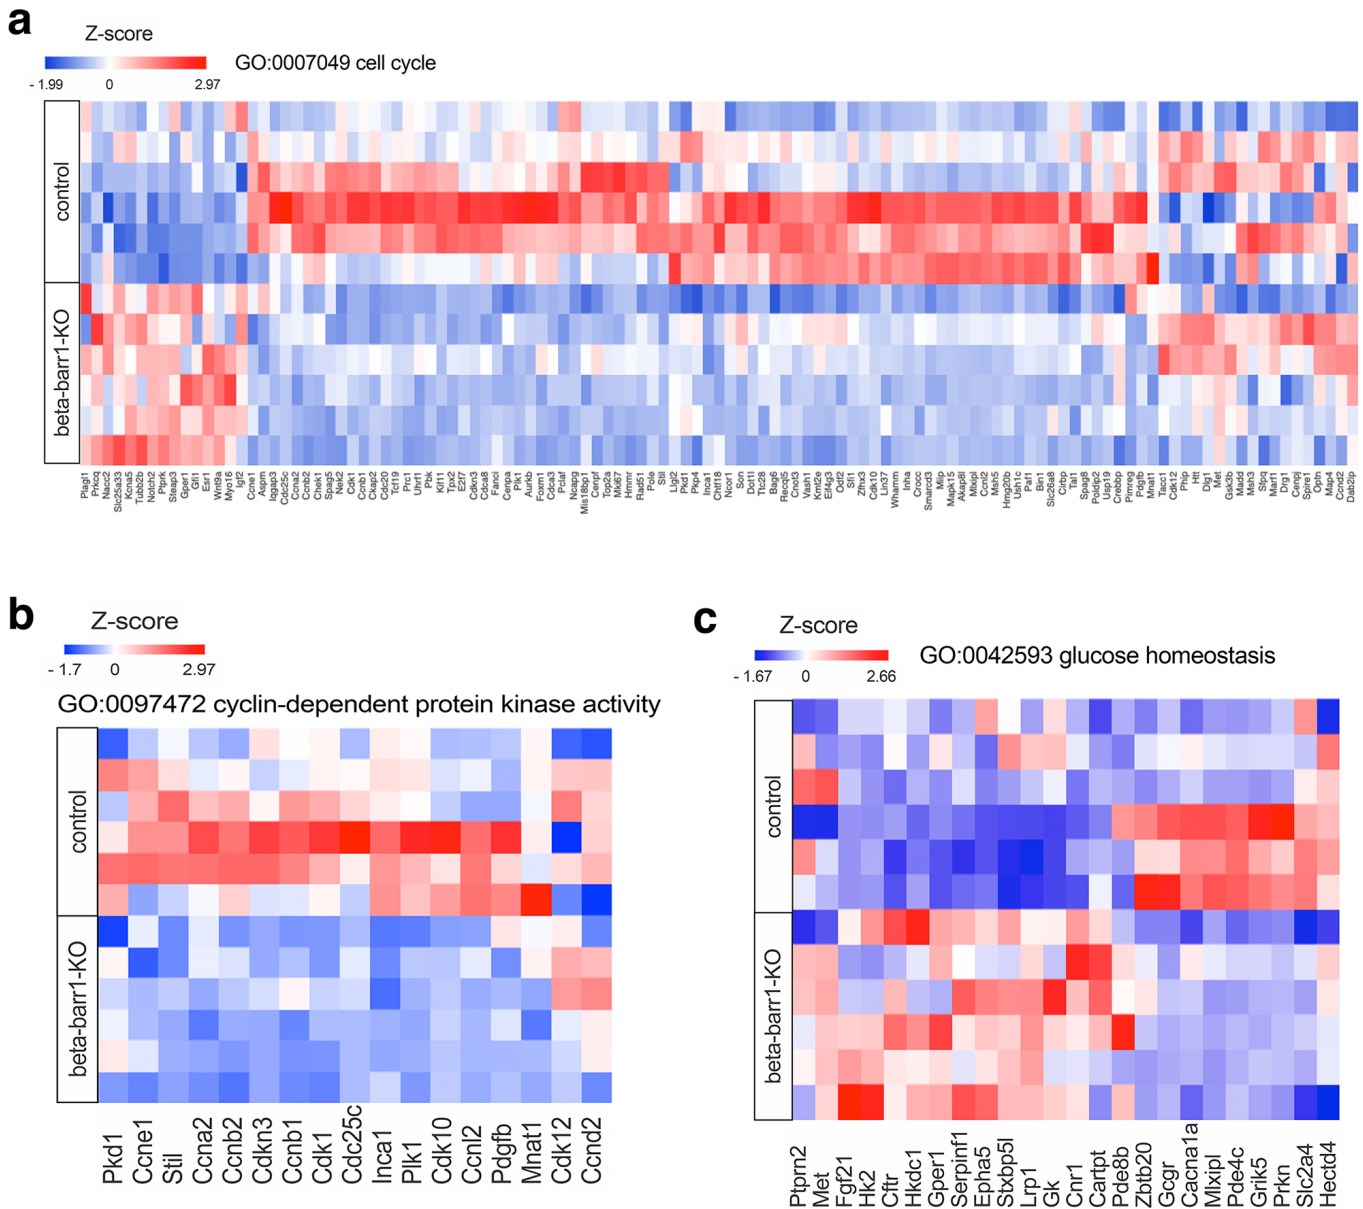

**Supplementary Fig. 6. Heat maps displaying color-coded expression levels of differentially expressed genes.** RNA-seq analysis was used to determine changes in gene expression in pancreatic islets prepared from HFD beta-barr1-KO mice and HFD control littermates. **a-c** Heat map displays of differentially expressed genes (cut-off: log<sub>2</sub>(1) or 2-fold). The heat maps show the differential expression of genes involved in cell cycle (GO term: 0007049; 116 out of a total of 1971 genes) (**a**), cyclin-dependent protein kinase activity (GO term: 0097472; 17 out of a total of 133 genes) (**b**), and glucose homeostasis (GO term: 0042593; 24 out of a total of 294 genes) (**c**), generated using Partek Flow. Islet RNA was collected from male littermates that had been maintained on a HFD for ~10 weeks (n=6 mice per genotype; age: ~20 weeks).

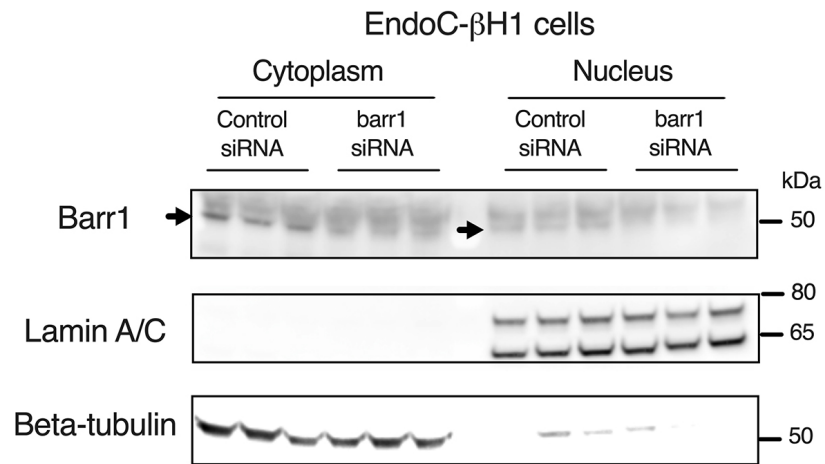

**Supplementary Fig. 7.** Human EndoC- $\beta$ H1 cells express endogenous Barr1 in nuclear and cytosolic protein extracts, as determined by Western blotting. Treatment of cells with *BARR1* siRNA significantly decreases Barr1 expression in both fractions. Lamin A/C and beta-tubulin were used as nuclear and cytoplasmic marker proteins, respectively. The blots shown are representative of 3 independent experiments.

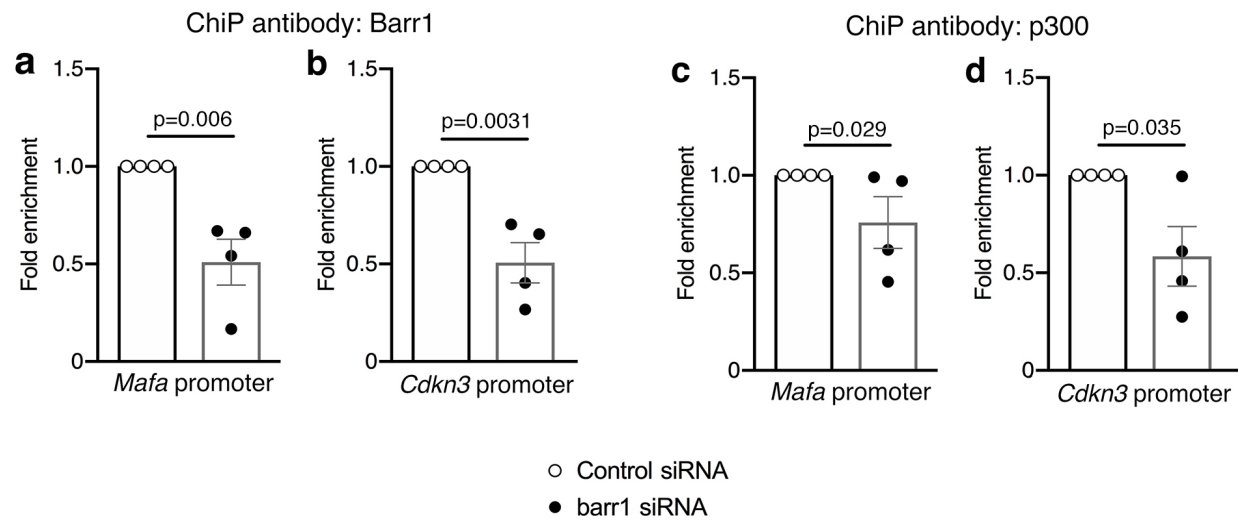

**Supplementary Fig. 8. Beta-cell *barr1* deficiency leads to decreased fold enrichment at the *MafA* and *Cdkn3* promoters in MIN6-K8 cells.** a-d ChIP experiments were carried out using antibodies against *barr1* and p300 with MIN6-K8 cells transfected with either scrambled control or *barr1* siRNA. The presence of *MafA* and *Cdkn3* promoter sequences in the input DNA recovered from the antibody-bound chromatin segments was analyzed by qPCR. Data were normalized to the corresponding input controls. Primers used for qPCR studies are listed in Supplementary Table 2. Data are presented as means  $\pm$  s.e.m. from four independent ChIP experiments. *P* values are indicated in the different panels (unpaired two-tailed t-test). Source data are provided as a Source data file.

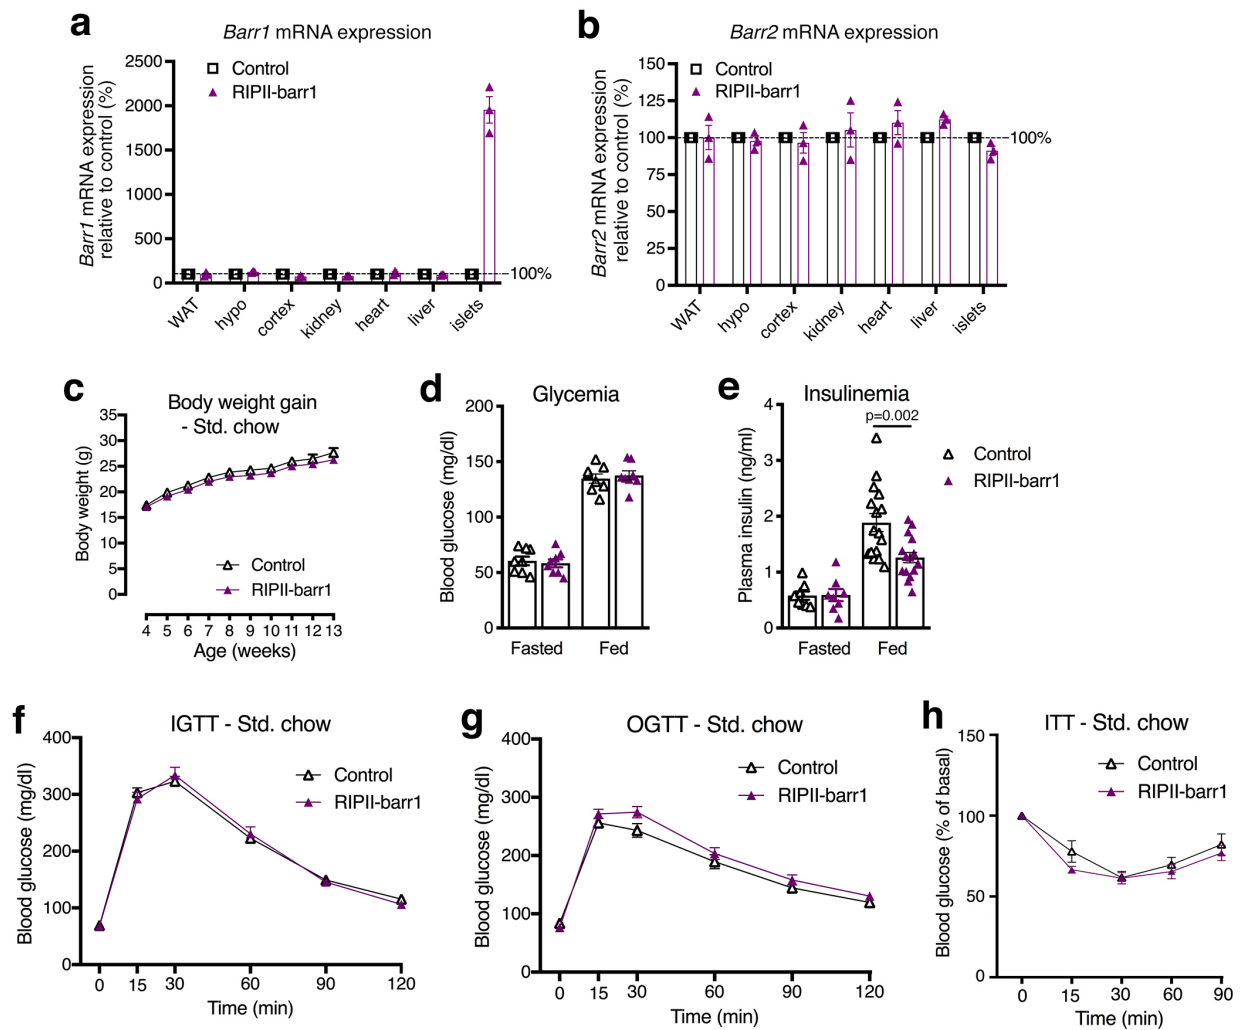

**Supplementary Fig. 9. Mice overexpressing *barr1* in beta-cells (RIPII-barr1 mice) show unchanged glucose tolerance and insulin sensitivity when maintained on standard chow.**

All experiments were carried out with male RIPII-barr1 mice and WT control littermates maintained on standard mouse chow. (a, b) qRT-PCR studies indicating selective overexpression of *barr1* in pancreatic islets of RIPII-barr1 mice (A). *Barr2* mRNA levels were similar in tissues from control (WT) and RIPII-barr1 mice (B). WAT, white adipose tissue; hypo, hypothalamus; cortex, cerebral cortex. (c) Body weight measurements. (d, e) Blood glucose (d) and plasma insulin (e) levels in freely fed or fasted (14-16 hr overnight fast) mice. (f) I.p. glucose tolerance test (IGTT). After an overnight fast, mice were injected with glucose (2 g/kg i.p.). (g) Oral glucose tolerance test (OGTT). After an overnight fast, mice received an oral gavage of glucose (2 g/kg i.p.). (h) Insulin tolerance test (ITT). Mice were fasted for 4 hr and then injected with insulin (1 U/kg i.p.). Blood glucose levels were measured at the indicated time points.

Data are given as means  $\pm$  s.e.m. (number of mice per group: a and b, 3; c and d, 8; e, 8 for fasted and 16 for fed mice, respectively; f, 8; g, 10 control and 9 RIPII-barr1 mice, respectively; h, 8) (mouse age: 12-16 weeks). *P* value is indicated in panel e (unpaired two-tailed t-test). Source data are provided as a Source data file.

**Supplementary Table 1. Source of reagents and animals**

| REAGENT or RESOURCE                                           | SOURCE                   | IDENTIFIER  |
|---------------------------------------------------------------|--------------------------|-------------|
| <b>Antibodies</b>                                             |                          |             |
| Pdx1                                                          | Cell Signaling           | 5679S       |
| p300                                                          | Cell Signaling           | 86377       |
| $\beta$ -Arrestin-1                                           | Cell Signaling           | 12697       |
| $\beta$ -Actin                                                | Cell Signaling           | 8457        |
| p-Akt (T308)                                                  | Cell Signaling           | 2975        |
| p-Akt (S473)                                                  | Cell Signaling           | 9271        |
| Akt                                                           | Cell Signaling           | 9272        |
| p-Foxo1                                                       | Cell Signaling           | 9461        |
| Foxo1                                                         | Cell Signaling           | 14952       |
| p-Creb                                                        | Cell Signaling           | 9198        |
| Creb                                                          | Cell Signaling           | 9197        |
| p-Erk1/2 (p44/42 MAPK)                                        | Cell Signaling           | 4376        |
| Erk1/2 (p44/42 MAPK)                                          | Cell Signaling           | 9102        |
| p-Gsk3 $\beta$                                                | Cell Signaling           | 5558        |
| Gsk3 $\beta$                                                  | Cell Signaling           | 9315        |
| Irs-2                                                         | Cell Signaling           | 3089        |
| Lamin A/C                                                     | Cell Signaling           | 4777        |
| $\beta$ -tubulin                                              | Cell Signaling           | 2146        |
| Anti-rabbit IgG, HRP-linked secondary antibody                | Cell Signaling           | 7074S       |
| Anti-mouse IgG, HRP-linked secondary antibody                 | Cell Signaling           | 7076S       |
| Normal rabbit IgG                                             | Cell Signaling           | 2729        |
| Ki67                                                          | Abcam                    | ab15580     |
| Insulin (guinea pig)                                          | Abcam                    | ab7842      |
| Glucagon (rabbit)                                             | ThermoFisher             | RB-1422-A1  |
| Somatostatin (rabbit)                                         | Abcam                    | Ab108456    |
| Alexa Fluor 555 goat anti-guinea pig                          | ThermoFisher             | A21435      |
| Alexa Fluor 488 goat anti-rabbit                              | ThermoFisher             | A11034      |
| <b>Chemicals, Peptides, and Recombinant Proteins</b>          |                          |             |
| BCA protein assay                                             | Pierce                   | 23225       |
| ECL western blotting substrate                                | Pierce                   | 32106       |
| Bovine serum albumin (fatty acid-free)                        | Sigma-Aldrich            | A7030       |
| Nucleofector <sup>TM</sup> kit                                | Lonza                    | VCA-1002    |
| Tween 20                                                      | Fisher Scientific        | BP337       |
| TRIzol                                                        | ThermoFisher             | 15596026    |
| RNase-free DNase I                                            | Qiagen                   | 79254       |
| Power SYBR Green PCR Master Mix                               | Applied Biosystems       | 4367659     |
| RNeasy mini kit                                               | Qiagen                   | 74104       |
| SuperScript <sup>TM</sup> III First-Strand Synthesis SuperMix | Invitrogen               | 18080400    |
| cOmplete EDTA-free protease inhibitor cocktail                | Sigma-Aldrich            | 11873580001 |
| NuPAGE LDS sample buffer                                      | Thermo Fisher Scientific | NP0007      |
| <b>Critical Commercial Assays</b>                             |                          |             |
| Rat insulin ELISA kit                                         | Crystal Chem             | 90010       |

|                                               |                                                 |                                                                                                                                                                   |
|-----------------------------------------------|-------------------------------------------------|-------------------------------------------------------------------------------------------------------------------------------------------------------------------|
| Mouse insulin standard                        | Crystal Chem                                    | 90020                                                                                                                                                             |
| Human insulin ELISA kit                       | Crystal Chem                                    | 90095                                                                                                                                                             |
| Mouse glucagon ELISA kit                      | Mercodia                                        | 10-1281-01                                                                                                                                                        |
| Ultrasensitive mouse insulin ELISA kit        | Mercodia                                        | 10-1249-01                                                                                                                                                        |
| ChIP kit                                      | Abcam                                           | ab500                                                                                                                                                             |
| Dynabeads Co-Immunoprecipitation kit          | Thermo Fisher Scientific                        | 14321D                                                                                                                                                            |
| Nuclear Extraction kit                        | Abcam                                           | Ab113474                                                                                                                                                          |
| <b>Experimental Models: Cell Lines</b>        |                                                 |                                                                                                                                                                   |
| MIN6-K8 cells                                 | Gift by Dr. Susumu Seino <sup>1</sup>           |                                                                                                                                                                   |
| EndoC- $\beta$ H1 cells                       | Provided by Dr. Raphael Scharfmann <sup>2</sup> |                                                                                                                                                                   |
| <b>Experimental Models: Organisms/Strains</b> |                                                 |                                                                                                                                                                   |
| <i>Pdx1-Cre-ER<sup>TM</sup></i> mice          | Provided by Dr. Doug Melton <sup>3</sup>        |                                                                                                                                                                   |
| <i>RIP11-barr1</i> mice                       | Generated at the NIDDK for this study           |                                                                                                                                                                   |
| <i>Barr1 f/f</i> mice                         | Provided by Dr. Robert Lefkowitz <sup>4</sup>   |                                                                                                                                                                   |
| <b>Recombinant DNA</b>                        |                                                 |                                                                                                                                                                   |
| Pdx1-pGL3 construct                           | Provided by Dr. Anabel Rojas <sup>5</sup>       |                                                                                                                                                                   |
| pGL3 luciferase reporter vector               | Promega                                         | E1751                                                                                                                                                             |
| <b>Software and Algorithms</b>                |                                                 |                                                                                                                                                                   |
| Prism 7                                       | Graph Pad                                       | <a href="https://www.graphpad.com/scientific-software/prism/">https://www.graphpad.com/scientific-software/prism/</a>                                             |
| ImageJ                                        | ImageJ                                          | <a href="http://imagej.net/Adiposoft">http://imagej.net/Adiposoft</a>                                                                                             |
| Metacore                                      | Clarivate Analytics                             | <a href="https://portal.genego.com/">https://portal.genego.com/</a>                                                                                               |
| Ingenuity Pathway Analysis                    | Qiagen                                          | <a href="https://www.qiagenbioinformatics.com/products/ingenuity-pathway-analysis/">https://www.qiagenbioinformatics.com/products/ingenuity-pathway-analysis/</a> |
| Partek Flow                                   | Partek                                          | <a href="https://www.partek.com/partek-flow/">https://www.partek.com/partek-flow/</a>                                                                             |

**Supplementary Table 2. Primers used for qRT-PCR studies**

| <b>Mouse gene</b>      | <b>Primer sequence</b>                                                   | <b>Amplicon (bp)</b> |
|------------------------|--------------------------------------------------------------------------|----------------------|
| <i>Beta-actin</i>      | QuantiTect Primer (Qiagen)<br>Catalog #: QT01136772                      | 77                   |
| <i>Barr1 (Arrb1)</i>   | Forward: 5' AAGAAGGCAAGCCCCAAT<br>Reverse: 5' CGCAGGTCAGTGTCACGTAG       | 151                  |
| <i>Barr2 (Arrb2)</i>   | Forward: 5' GTCTTCAAGAAGTCGAGCCCT<br>Reverse: 5' CACGAACACTTTCCGGTCCT    | 144                  |
| <i>Cav1.2</i>          | QuantiTect Primer (Qiagen)<br>Catalog #: QT00150752                      | 115                  |
| <i>Cav1.3</i>          | QuantiTect Primer (Qiagen)<br>Catalog #: QT00112238                      | 96                   |
| <i>Ins2</i>            | Forward: 5' CTGGCCCTGCTCTTCCTCTGG<br>Reverse: 5' CTGAAGGTCACCTGCTCCCGG   | 204                  |
| <i>Irs2</i>            | Forward: 5' CTGCGTCCTCTCCCAAAGTG<br>Reverse: 5' GGGGTCATGGGCATGTAGC      | 124                  |
| <i>Pdx1</i>            | Forward: 5' CCCCAGTTTACAAGCTCGCT<br>Reverse: 5' CTCGGTTCCATTCGGGAAAGG    | 177                  |
| <i>MafA</i>            | Forward: 5' AGGAGGAGGTCATCCGACTG<br>Reverse: 5' CTTCTCGCTCTCCAGAATGTG    | 113                  |
| <i>Gck</i>             | Forward: 5' AGGAGGCCAGTGTAAGATGT<br>Reverse: 5' CTCCCAGGTCTAAGGAGAGAAA   | 90                   |
| <i>Sur1 (Abcc8)</i>    | QuantiTect Primer (Qiagen)<br>Catalog #: QT01042300                      | 77                   |
| <i>Kir6.2 (Kcnj11)</i> | QuantiTect Primer (Qiagen)<br>Catalog #: QT00305319                      | 87                   |
| <i>Pcx</i>             | Forward: 5' CTGAAGTTCCAAACAGTTCGAGG<br>Reverse: 5' CGCACGAAACACTCGGATG   | 162                  |
| <i>Glut2</i>           | Forward: 5' TCAGAAGACAAGATCACCGGA<br>Reverse: 5' GCTGGTGTGACTGTAAGTGGG   | 215                  |
| <i>Ucp2</i>            | Forward: 5' ATGGTTGGTTTCAAGGCCACA<br>Reverse: 5' TTGGCGGTATCCAGAGGGAA    | 113                  |
| <i>Nkx6.1</i>          | Forward: 5' CAGCAAATCTTCGCCCTGGA<br>Reverse: 5' AACCAGACCTTGACCTGACT     | 116                  |
| <i>Snap25</i>          | Forward: 5' CAACTGGAACGCATTGAGGAA<br>Reverse: 5' GGCCACTACTCCATCCTGATTAT | 177                  |
| <i>Stx1a</i>           | Forward: 5' GAGCCAGGGGGAGATGATTGA                                        | 194                  |

|                       |                                                                              |                      |
|-----------------------|------------------------------------------------------------------------------|----------------------|
|                       | Reverse: 5' ATCCAAAGATGCCCCCGATG                                             |                      |
| <i>Vamp2</i>          | Forward: 5' GCTGGATGACCGTGCAGAT<br>Reverse: 5' GATGGCGCAGATCACTCCC           | 130                  |
| <i>Epac2</i>          | Forward: 5' CAAGATGTCTTGGTACTGGAGAAG<br>Reverse: 5' CAGGTGTTCTTGACATCACAGTAT | 103                  |
| <i>Ng3</i>            | Forward: 5' ACGCAATTTACTCCAGGCGA<br>Reverse: 5' GAGGCGCCATCCTAGTTCTC         | 169                  |
| <i>NeuroD1</i>        | Forward: 5' ACCTTTTAACAACAGGAAGTGGA<br>Reverse: 5' CTCATCTGTCCAGCTTGGGG      | 101                  |
| <i>Cdk2</i>           | Forward: 5' CAAAGCCAAGCACGTAGAGAC<br>Reverse: 5' TGCACCACATATTGACTGTCC       | 141                  |
| <i>Pdx1 promoter</i>  | Forward: 5' TGGAGGACCAGGTCAGAGG<br>Reverse: 5' GCGCTGGCAAGGATAGACT           | 114                  |
| <i>Mafa promoter</i>  | Forward: 5' CTGGAACCTCAGAATCTGCCA<br>Reverse: 5' GCCCAGCTGTCAATCTCCTG        | 150                  |
| <i>Cdkn3 promoter</i> | Forward: 5' AAAGCCAGCTAAATGAAGACTGAA<br>Reverse: 5' GCGCAAGGAAGTGAAGTAGG     | 125                  |
| <b>Human gene</b>     | <b>Primer sequence</b>                                                       | <b>Amplicon (bp)</b> |
| <i>PDX1</i>           | Forward: 5' GGAGCTGGCTGTCATGTTG<br>Reverse: 5' CACTTCATGCGGCGGTTT            | 72                   |
| <i>MAFA</i>           | Forward: 5' GAGAGCGAGAAGTGCCAACT<br>Reverse: 5' CTTGTACAGGTCCCGCTCTTT        | 87                   |
| <i>INS</i>            | Forward: 5' AGGCCATCAAGCAGATCACT<br>Reverse: 5' TGTGTTGTTCAAAAGGCTGC         | 117                  |
| <i>BARR1 (ARRB1)</i>  | Forward: 5' TCAAGCACGAAGACACGAAC<br>Reverse: 5' ATGCAAGATCTCCCAACAGG         | 141                  |
| <i>BARR2 (ARRB2)</i>  | Forward: 5' CACGTCACCAACAACCTCCAC<br>Reverse: 5' TTGTTGAGTTGAGCCACAG         | 120                  |
| <i>HPRT</i>           | Forward: 5' TTGCTTTCCTTGGTCAGGCA<br>Reverse: 5' ATCCAACACTTCGTGGGGTC         | 85                   |

- 1 Iwasaki, M. *et al.* Establishment of new clonal pancreatic beta-cell lines (MIN6-K) useful for study of incretin/cyclic adenosine monophosphate signaling. *Journal of diabetes investigation* **1**, 137-142, doi:10.1111/j.2040-1124.2010.00026.x (2010).
- 2 Scharfmann, R. *et al.* Development of a conditionally immortalized human pancreatic beta cell line. *J Clin Invest* **124**, 2087-2098, doi:10.1172/jci72674 (2014).
- 3 Gu, G., Dubauskaite, J. & Melton, D. A. Direct evidence for the pancreatic lineage: NGN3+ cells are islet progenitors and are distinct from duct progenitors. *Development (Cambridge, England)* **129**, 2447-2457 (2002).
- 4 Kim, J. *et al.* beta-arrestin 1 regulates beta2-adrenergic receptor-mediated skeletal muscle hypertrophy and contractility. *Skeletal muscle* **8**, 39, doi:10.1186/s13395-018-0184-8 (2018).
- 5 Carrasco, M., Delgado, I., Soria, B., Martin, F. & Rojas, A. GATA4 and GATA6 control mouse pancreas organogenesis. *J Clin Invest* **122**, 3504-3515, doi:10.1172/jci63240 (2012).
